# Supplementary material for: Introduction of the acylamino group to bridged bis(nitroamino-1,2,4-triazole): a strategy for tuning the sensitivity of energetic materials
Source: Royal Society of Chemistry journal article supplement (doi:10.1039/d1nj03551g), 2021-01-01
Supplement: d1nj03551g1.pdf [file d1nj03551g1.pdf]

**Supporting Information (SI)**

**The Introduction of Acylamino Group to Bridge Bis-(Nitroamino-1,2,4-Triazole): A Strategy toward insensitive Energetic Materials**

**Dongxu Chen<sup>1</sup>, Jiangshan Zhao<sup>1</sup>, Hongwei Yang<sup>1</sup>, Hao Gu<sup>1</sup> and Guangbin Cheng<sup>1,\*</sup>**

Nanjing 210094, P. R. China

E-mail: [gcheng@mail.njust.edu.cn](mailto:gcheng@mail.njust.edu.cn) (G. Cheng), [hyang@mail.njust.edu.cn](mailto:hyang@mail.njust.edu.cn) (H. Yang)

## Table of contents

|                                                                              |     |
|------------------------------------------------------------------------------|-----|
| 1. Experimental Section.....                                                 | S3  |
| 2. Crystallographic Data for Compounds <b>3</b> .....                        | S3  |
| 3. Computational Methodology.....                                            | S4  |
| 4. $^1\text{H}$ and $^{13}\text{C}$ NMR spectra of the title compounds ..... | S7  |
| 5. References .....                                                          | S12 |

## 1. Experimental Section

### X-ray crystallography

The data was collected with a Bruker three-circle platform diffractometer equipped with a SMART APEX II CCD detector. A Kryo-Flex low-temperature device was used to keep the crystals at a constant 173 K during the data collection. The data collection and the initial unit cell refinement were performed by using APEX2 (v2010.3-0). Data reduction was performed by using SAINT (v7.68A) and XPREP (v2008/2). Corrections were applied for Lorentz, polarization, and absorption effects by using SADABS (v2008/1). The structure was solved and refined with the aid of the programs in the SHELXTL-plus (v2008/4) system of programs. The full-matrix least-squares refinement on F<sup>2</sup> included atomic coordinates and anisotropic thermal parameters for all non-H atoms. The H atoms were included in a riding model. The structure was solved by direct methods with SHELXS-97 and expanded by using the Fourier technique. The nonhydrogen atoms were refined anisotropically. The hydrogen atoms were located and refined.

## 2. Crystallographic Data for Compounds 3.

**Table S1** Crystal data and structure refinement details for **3**·3H<sub>2</sub>O.

| molecule                                  | <b>3</b> ·3H <sub>2</sub> O                                                     |
|-------------------------------------------|---------------------------------------------------------------------------------|
| CCDC number                               | 2027401                                                                         |
| Empirical formula                         | C <sub>5</sub> H <sub>6</sub> N <sub>10</sub> O <sub>3</sub> ·3H <sub>2</sub> O |
| Formula weight                            | 208.23                                                                          |
| Temperature/K                             | 173                                                                             |
| Crystal system                            | monoclinic                                                                      |
| Space group                               | P2 <sub>1</sub> /n                                                              |
| a/Å                                       | 9.9197(14)                                                                      |
| b/Å                                       | 7.1740(7)                                                                       |
| c/Å                                       | 16.673(2)                                                                       |
| α/°                                       | 90                                                                              |
| β/°                                       | 106.745(4)                                                                      |
| γ/°                                       | 90                                                                              |
| Volume/Å <sup>3</sup>                     | 1136.2(2)                                                                       |
| Z                                         | 4                                                                               |
| ρ (calc) mg/mm <sup>3</sup>               | 1.697                                                                           |
| Absorption coefficient m/mm <sup>-1</sup> | 0.149                                                                           |
| F(000)                                    | 600                                                                             |
| Crystal size/mm <sup>3</sup>              | 0.02×0.11× 0.23                                                                 |

|                                           |                                                                      |
|-------------------------------------------|----------------------------------------------------------------------|
| 2 $\Theta$ range for data collection      | 3.1 to 25.6                                                          |
| Index ranges                              | -17 $\leq h \leq$ 13,<br>-7 $\leq k \leq$ 7,<br>-26 $\leq l \leq$ 21 |
| Reflections collected                     | 6638                                                                 |
| Independent reflections                   | 2119 [R <sub>int</sub> = 0.0960, R <sub>sigma</sub> = 0.0863]        |
| Data/restraints/parameters                | 2119/0/224                                                           |
| Goodness-of-fit on F <sup>2</sup>         | 1.040                                                                |
| Final R indexes [I $\geq$ 2 $\sigma$ (I)] | 0.0522, 0.1276                                                       |
| Final R indexes [all data]                | -0.25, 0.35                                                          |

### 3. Computational Methodology

Calculations were performed by using the Gaussian 09 suite of programs. The geometric optimization of all the structures and frequency analyses for calculation of heats of formation was carried out by using B3-LYP functional<sup>[1]</sup> with 6-311G\*\* basis set<sup>[2]</sup>. All of the optimized structures were characterized to be local energy minima on the potential surface without any imaginary frequencies. The heats of formation (HOF) of the title compounds were computed through appropriate isodesmic reactions (Scheme S1). The isodesmic reaction processes, i.e., the number of each kind of formal bond is conserved, are used with application of the bond separation reaction (BSR) rules. The molecule is broken down into a set of two heavy-atom molecules containing the same component bonds. The isodesmic reactions used to derive the HOF of the title compounds are in Scheme S1. The change of enthalpy for the reactions at 298 K can be expressed as

$$\Delta H_{298} = \sum \Delta_f H_p - \sum \Delta_f H_R \quad (1)$$

where  $\Delta_f H_R$  and  $\Delta_f H_P$  are the HOF of reactants and products at 298 K, respectively, and  $\Delta H_{298}$  can

be calculated using the following expression:

$$\Delta H_{298} = \Delta E_{298} + \Delta(PV) = \Delta E_0 + \Delta ZPE + \Delta H_T + \Delta nRT \quad (2)$$

where  $E_0$  is the change in total energy between the products and the reactants at 0 K;  $\Delta ZPE$  is the difference between the zero-point energies (ZPE) of the products and the reactants at 0 K;  $\Delta H_T$  is thermal correction from 0 to 298 K. The  $\Delta(PV)$  value in Eq. (2) is the  $PV$  work term. It equals  $\Delta nRT$  for the reactions of ideal gas. For the isodesmic reactions,  $\Delta n = 0$ , so  $\Delta(PV) = 0$ .

On the left

side of Eq. (1), apart from target compound, all the others are called reference compounds.

The HOF of reference compounds are available either from the experiments <sup>[3-5]</sup> or from the high level computing like CBS-4M<sup>[6]</sup>.

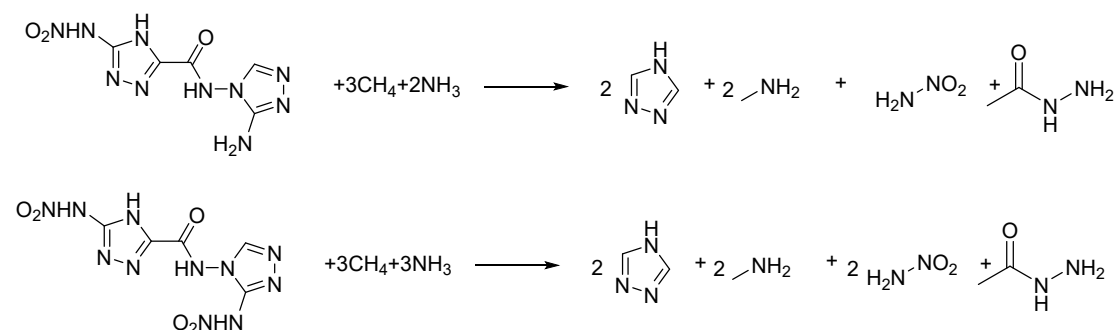

**Scheme S1** Isodesmic and tautomeric reactions for **3** and **4** to calculate the HOF.

**Table S2** Abinitio computational values of small molecules used in isodesmic and tautomeric reactions.

| compound                              | $E_0^a$      | $ZPE^b$ | $H_T^c$ | $HOF^d$  |
|---------------------------------------|--------------|---------|---------|----------|
| CH <sub>4</sub>                       | -40.5339263  | 112.26  | 10.04   | -74.6    |
| NH <sub>3</sub>                       | -56.5826356  | 86.27   | 10.05   | -45.9    |
| CH <sub>3</sub> NH <sub>2</sub>       | -95.8718463  | 160.78  | 11.64   | -22.5    |
| NH <sub>2</sub> NO <sub>2</sub>       | -261.125     | 98.79   | 12.39   | -3.9     |
| CH <sub>3</sub> C(O)NHNH <sub>2</sub> | -264.537     | 238.35  | 14.49   | 362.5896 |
| 1,2,4-triazole                        | -242.2683231 | 150.39  | 12.06   | 192.7    |

<sup>a</sup> Total energy calculated by B3LYP/6-31G\*\* method (*a.u.*); <sup>b</sup> zero-point correction (kJ mol<sup>-1</sup>); <sup>c</sup> thermal correction to enthalpy (kJ mol<sup>-1</sup>); <sup>d</sup> heat of formation (kJ mol<sup>-1</sup>).

4.  $^1\text{H}$  and  $^{13}\text{C}$  NMR spectra of the compounds 1-13

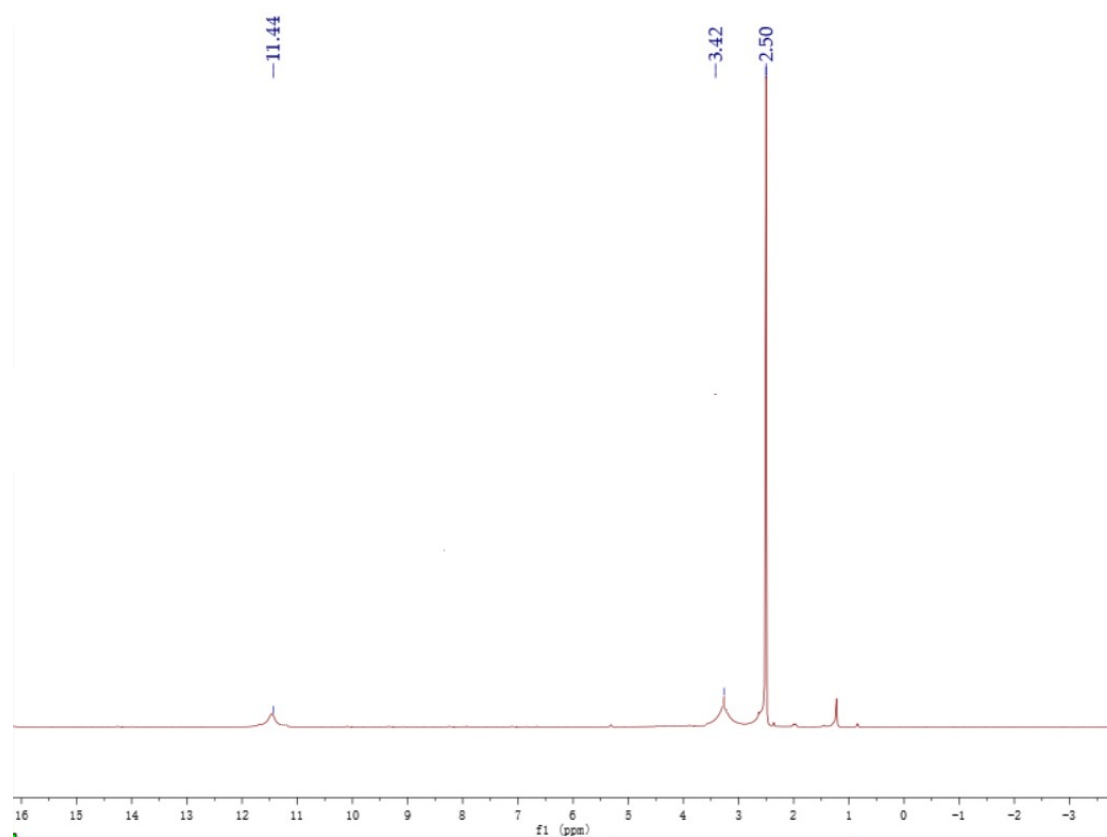

**Figure S1**  $^1\text{H}$  NMR spectra (500 MHz) of **1** in  $\text{DMSO}-d_6$  at 25 °C

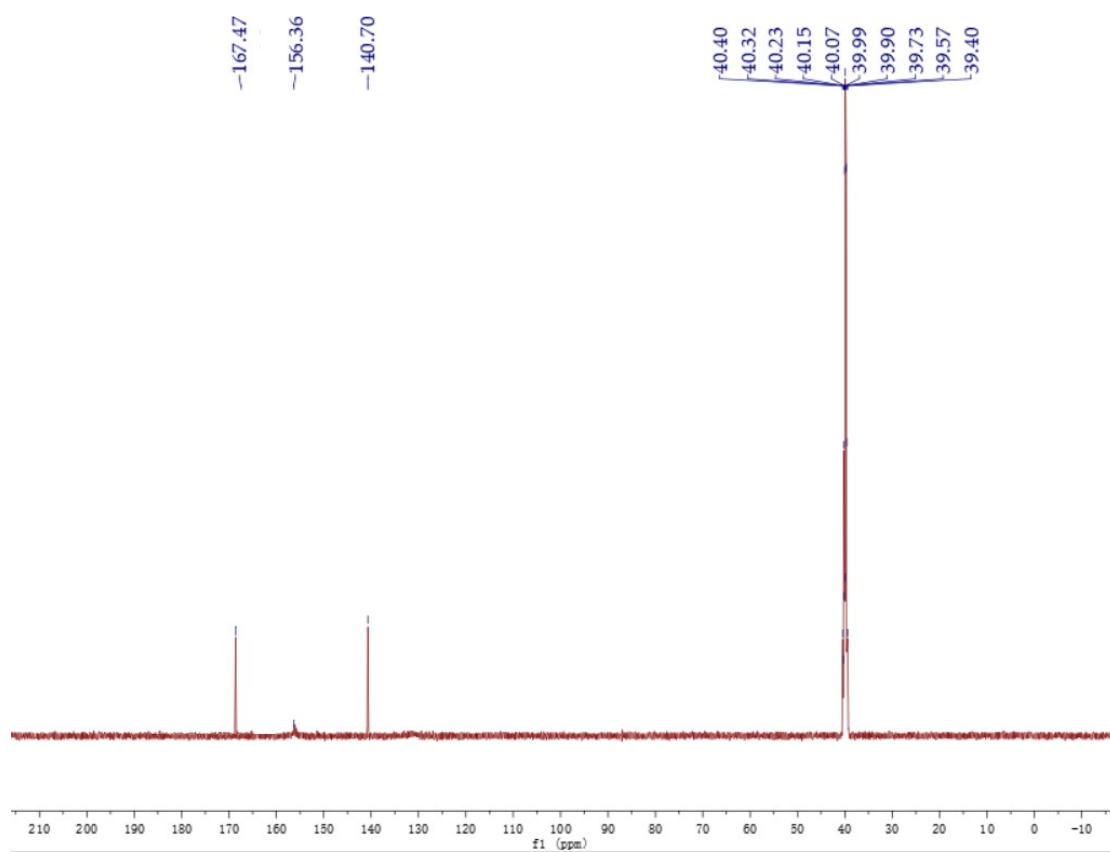

**Figure S2** <sup>13</sup>C NMR spectra (125 MHz) of **1** in DMSO-*d*<sub>6</sub> at 25 °C

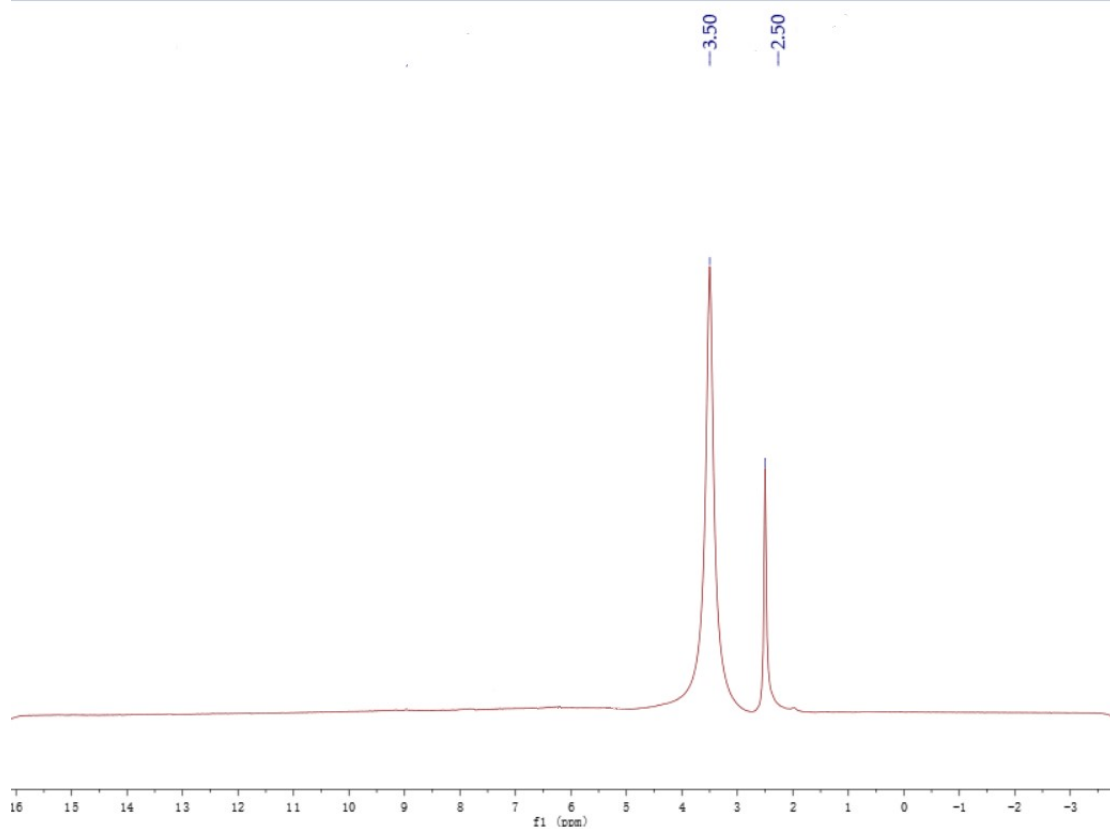

**Figure S3** <sup>1</sup>H NMR spectra (300 MHz) of **2** in DMSO-*d*<sub>6</sub> at 25 °C

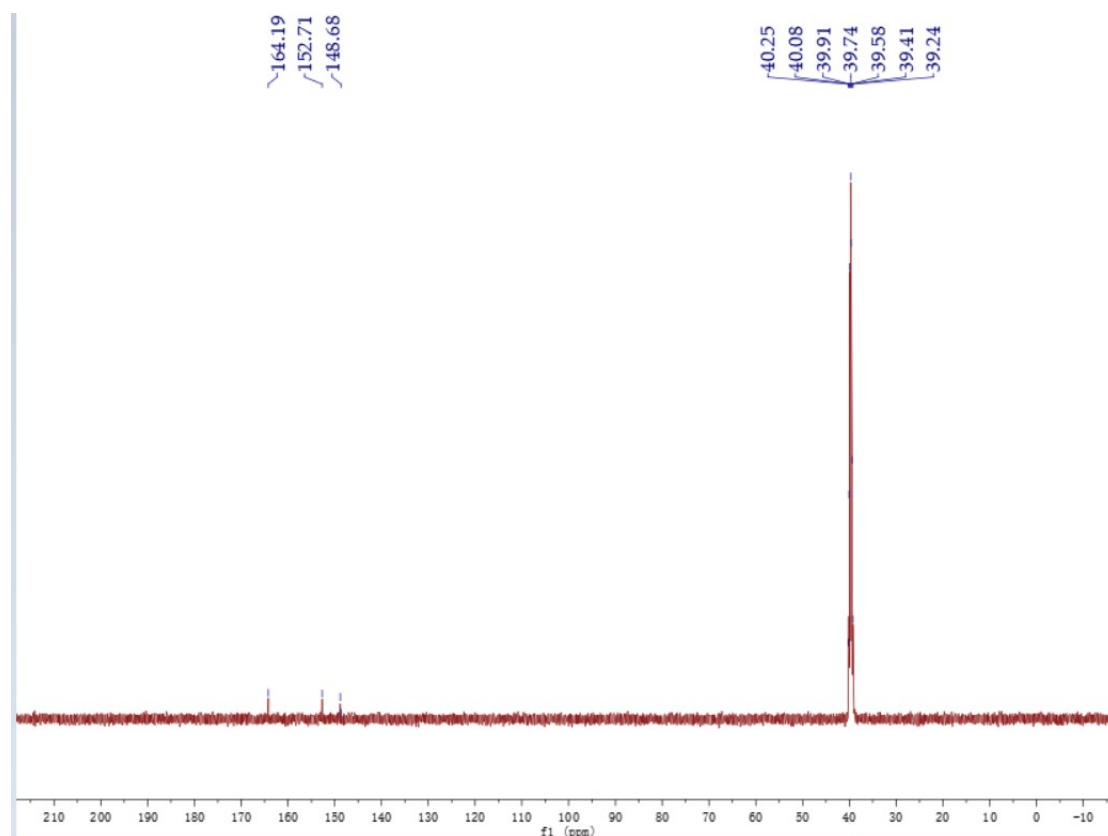

**Figure S4**  $^{13}\text{C}$  NMR spectra (125 MHz) of **2** in  $\text{DMSO-}d_6$  at 25 °C

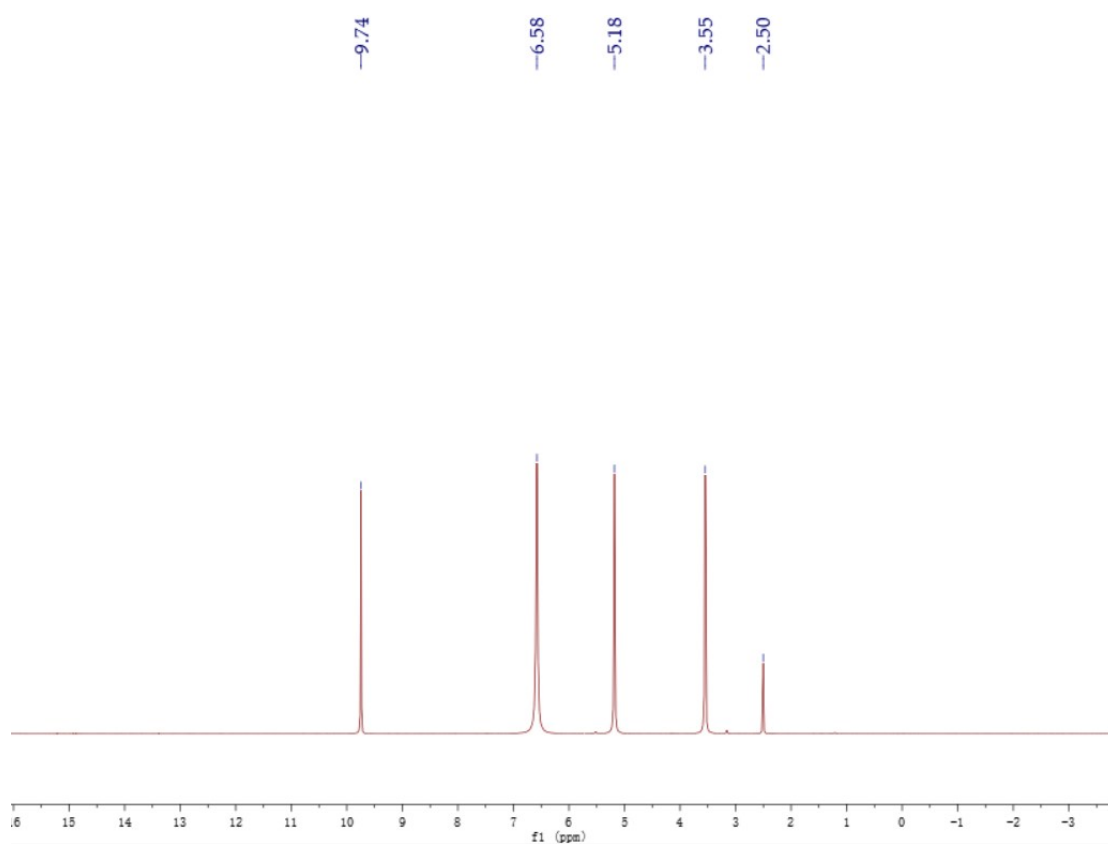

**Figure S5**  $^1\text{H}$  NMR spectra (300 MHz) of **3** in  $\text{DMSO-}d_6$  at 25 °C

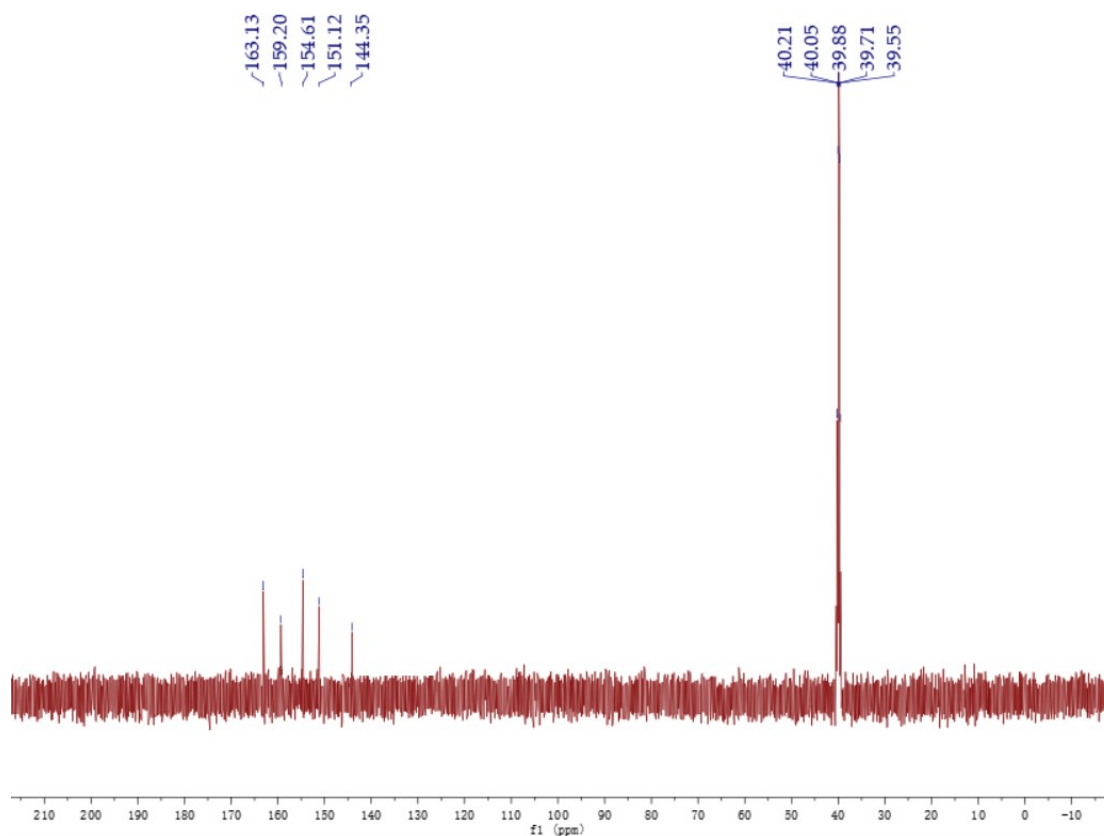

**Figure S6**  $^{13}\text{C}$  NMR spectra (125 MHz) of **3** in  $\text{DMSO-}d_6$  at 25 °C

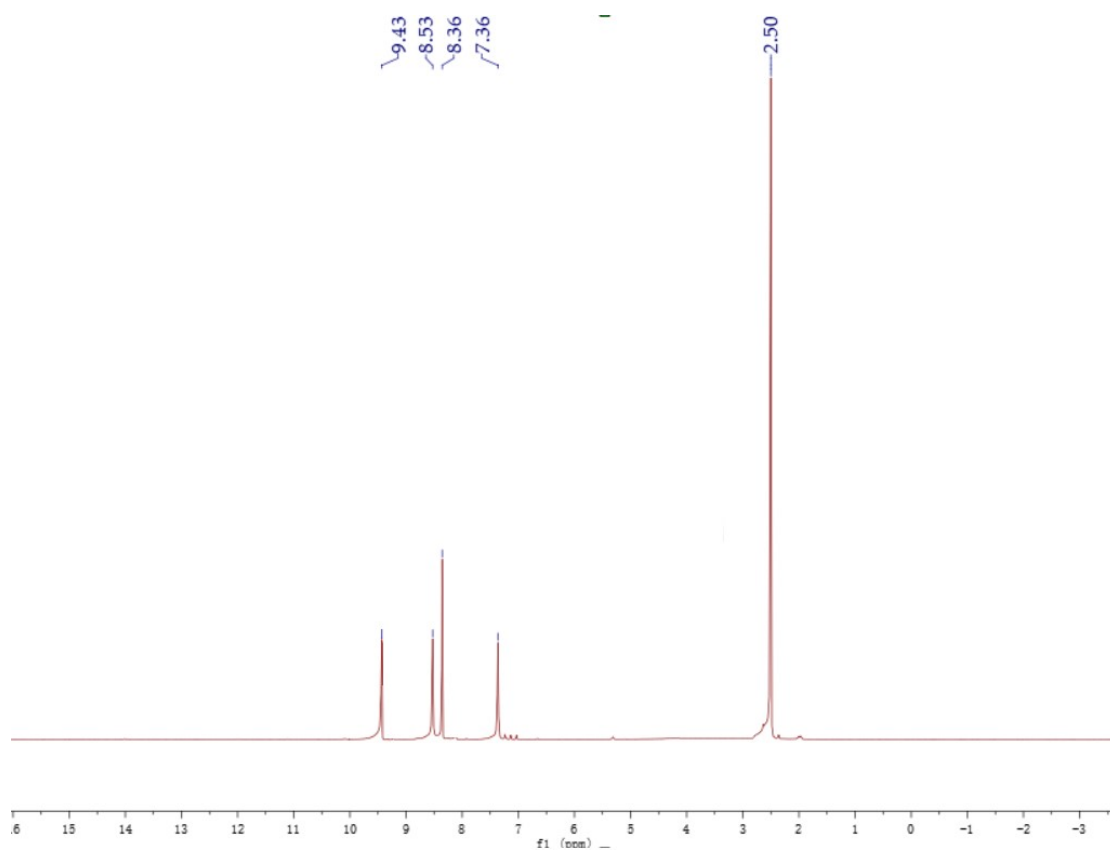

**Figure S7**  $^1\text{H}$  NMR spectra (300 MHz) of **4** in  $\text{DMSO-}d_6$  at 25 °C

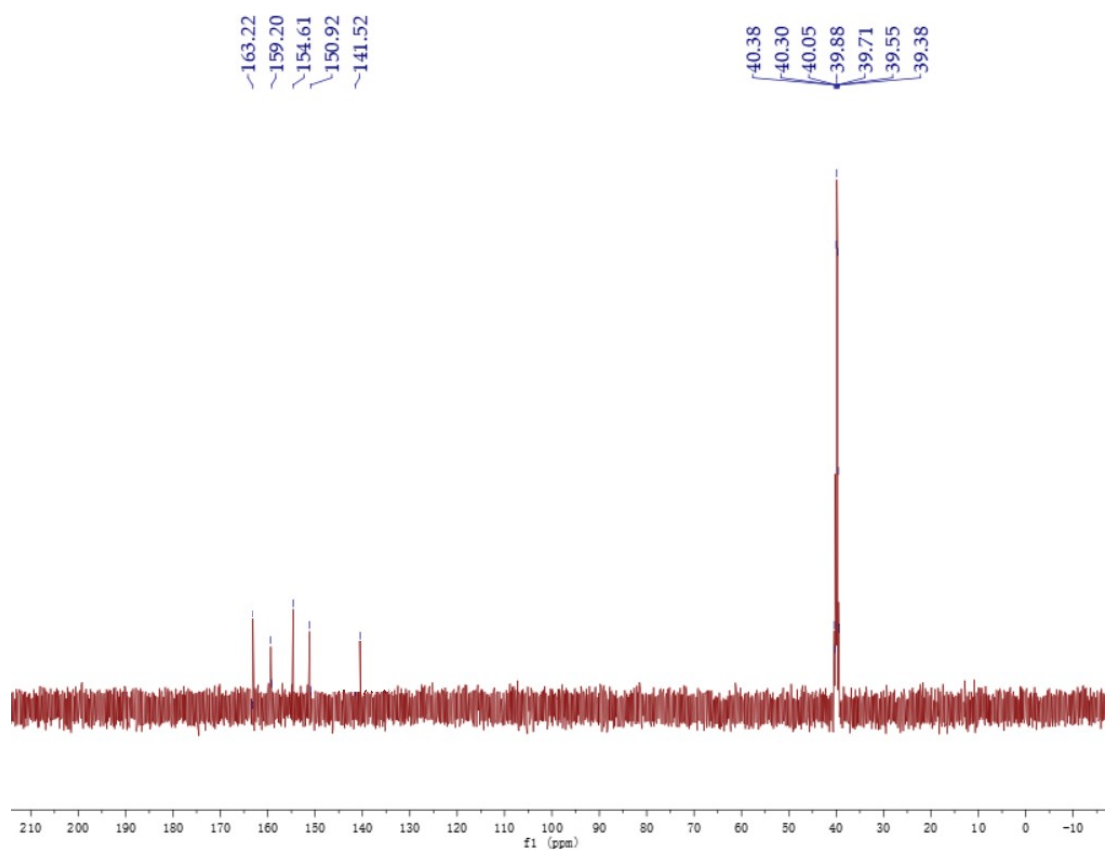

**Figure S8**  $^{13}\text{C}$  NMR spectra (125 MHz) of **4** in  $\text{DMSO}-d_6$  at  $25\text{ }^\circ\text{C}$

## 5. References

- [1] P. J. Stephens, F. J. Devlin, C. F. Chabalowski and M. J. Frisch, Ab Initio calculation of vibrational absorption and circular dichroism spectra using density functional force fields. *J. Phys. Chem.*, **1994**, 98, 11623-11627.
- [2] P. C. Hariharan and J. A. Pople, Influence of polarization functions on MO hydrogenation energies, *Theoretica Chimica Acta*. **1973**, 28, 213-22.
- [3] D. R. Lide, CRC Handbook of Chemistry and Physics, 88th Edition (Internet Version 2008), CRC Press/Taylor and Francis, Boca Raton, FL, 2007-2008.
- [4] N. Fischer, T. M. Klapötke and J. Stierstorfer, New nitriminotetrazoles - synthesis, structures and characterization, *Z. Anorg. Allg. Chem.*, **2009**, 635, 271-281.
- [5] Y. H. Joo, J. H. Chung, S. G. Cho and E. M. Goh, Energetic salts based on 1-methoxy-5-nitroiminotetrazole, *New J. Chem.*, **2013**, 37, 1180-1188.
- [6] O. M. Suleimenov and T. K. Ha, Ab initio calculation of the thermochemical properties of polysulfanes (H<sub>2</sub>Sn), *Chem. Phys. Lett.*, **1998**, 290, 451-457.
- [7] Y. Guo, G. H. Tao, Z. Zeng, H. Gao, D. A. Parrish, J. M. Shreeve, Energetic Salts Based on Monoanions of N,N-Bis(1H-tetrazol-5-yl)amine and 5,5'-Bis(tetrazole), *Chem. Eur. J.* **2010**, 16, 3753-3762.
- [8] Q. Wu, W. Zhu, H. Xiao, A new design strategy for high-energy low-sensitivity explosives: combining oxygen balance equal to zero, a combination of nitro and amino groups, and N-oxide in one molecule of 1-amino-5-nitrotetrazole-3N-oxide, *J. Mater. Chem. A*. **2014**, 2, 13006-13015.
